# Supplementary material
Source: Springer Nature journal article supplement (https://www.springermedizin.de/resource/supplementary/12907_2013_142_MOESM1_ESM.pdf/9524734)
Supplement: MOESM1 [file 9524734]

Table S1. Astrocytoma patient characteristics

| Patients, No. (%)*                           | Low-Grade Astrocytomas<br>n=25 | Anaplastic Astrocytomas<br>n=20 | Glioblastomas<br>n=60 |
|----------------------------------------------|--------------------------------|---------------------------------|-----------------------|
| <b>Sex</b>                                   |                                |                                 |                       |
| Male                                         | 15 (60.0)                      | 13 (65.0)                       | 37 (61.7)             |
| Female                                       | 10 (40.0)                      | 7 (35.0)                        | 23 (38.3)             |
| <b>Median age, years [IQR]</b>               | 35 [29.5-47.0]                 | 56 [46.3-66.0]                  | 64 [55.0-69.0]        |
| <b>Tumor Region</b>                          |                                |                                 |                       |
| Temporal                                     | 7 (28.0)                       | 7 (35.0)                        | 23 (38.3)             |
| Frontal                                      | 8 (32.0)                       | 6 (30.0)                        | 21 (35.0)             |
| Parietal                                     | 3 (12.0)                       | 1 (5.0)                         | 6 (10.0)              |
| Occipital                                    | 0 (0.0)                        | 2 (10.0)                        | 5 (8.3)               |
| Other                                        | 7 (28.0)                       | 4 (20.0)                        | 5 (8.3)               |
| <b>Tumor Side</b>                            |                                |                                 |                       |
| Right                                        | 9 (36.0)                       | 11 (55.0)                       | 34 (56.7)             |
| Left                                         | 9 (36.0)                       | 5 (25.0)                        | 21 (35.0)             |
| Other                                        | 7 (28.0)                       | 4 (20.0)                        | 5 (8.3)               |
| <b>Surgery</b>                               |                                |                                 |                       |
| Total resection                              | 14 (56.0)                      | 14 (70.0)                       | 45 (75.0)             |
| Subtotal resection                           | 9 (36.0)                       | 5 (25.0)                        | 11 (18.3)             |
| Partial resection                            | 2 (8.0)                        | 1 (5.0)                         | 4 (6.7)               |
| <b>Treatment</b>                             |                                |                                 |                       |
| No treatment                                 | 12 (48.0)                      | 4 (20.0)                        | 6 (10.0)              |
| Radiotherapy                                 | 8 (32.0)                       | 8 (40.0)                        | 42 (70.0)             |
| Radiotherapy and Chemotherapy                | 5 (20.0)                       | 8 (40.0)                        | 12 (20.0)             |
| <b>Median Overall Survival, months [IQR]</b> | 61.8 [32.5, 90.6]              | 13.0 [8.5, 17.4]                | 11.0 [7.6, 16.9]      |

IQR: Interquartile range
